# Supplementary material for: Epithelial-specific ERBB3 deletion results in a genetic background-dependent increase in intestinal and colon polyps that is mediated by EGFR
Source: PubMed Central journal article supplement (PMC8659709; doi:10.1371/journal.pgen.1009931), 2021-11-29
Supplement: pgen.1009931.s001.pdf [file pgen.1009931.s001.pdf]

**Fig. 1 Measurements**

| Background   | Measure                     | <i>Apc<sup>Min/+</sup>, Erbb3<sup>fl/fl</sup></i> | <i>Apc<sup>Min/+</sup>, Erbb3<sup>fl/fl</sup>, Tg(Vil1-Cre)</i> |
|--------------|-----------------------------|---------------------------------------------------|-----------------------------------------------------------------|
| C57BL/6J     | Intestinal polyp number     | 118.8 +/- 29.0                                    | 266.1 +/- 55.6                                                  |
|              | Colon polyp number          | 1.2 +/- 1.1                                       | 3.0 +/- 0.8                                                     |
|              | Duodenum polyp size         | 2.1 +/- 0.2                                       | 1.7 +/- 0.1                                                     |
|              | Proximal jejunum polyp size | 1.5 +/- 0.1                                       | 0.9 +/- 0.1                                                     |
|              | Distal jejunum polyp size   | 0.7 +/- 0.1                                       | 0.6 +/- 0.1                                                     |
|              | Ileum polyp size            | 1.0 +/- 0.1                                       | 1.0 +/- 0.1                                                     |
|              | Colon polyp size            | 3.2 +/- 0.3                                       | 1.0 +/- 0.2                                                     |
| B6129 hybrid | Intestinal polyp number     | 118.9 +/- 20.9                                    | 136.7 +/- 28.0                                                  |
|              | Colon polyp number          | 1.1 +/- 1.1                                       | 1.0 +/- 0.7                                                     |
|              | Duodenum polyp size         | 2.1 +/- 0.2                                       | 1.2 +/- 0.1                                                     |
|              | Proximal jejunum polyp size | 1.5 +/- 0.1                                       | 0.9 +/- 0.1                                                     |
|              | Distal jejunum polyp size   | 1.1 +/- 0.1                                       | 0.7 +/- 0.1                                                     |
|              | Ileum polyp size            | 1.0 +/- 0.1                                       | 1.0 +/- 0.2                                                     |
|              | Colon polyp size            | 3.2 +/- 0.3                                       | 2.9 +/- 0.2                                                     |
| B6;129 mix   | Intestinal polyp number     | 117.3 +/- 26.1                                    | 46.0 +/- 16.3                                                   |
|              | Colon polyp number          | 1.4 +/- 1.0                                       | 0.7 +/- 0.1                                                     |
|              | Duodenum polyp size         | 2.1 +/- 0.2                                       | 0.9 +/- 0.1                                                     |
|              | Proximal jejunum polyp size | 1.5 +/- 0.1                                       | 0.8 +/- 0.1                                                     |
|              | Distal jejunum polyp size   | 1.1 +/- 0.1                                       | 0.6 +/- 0.1                                                     |
|              | Ileum polyp size            | 1.0 +/- 0.1                                       | 0.6 +/- 0.1                                                     |
|              | Colon polyp size            | 3.2 +/- 0.3                                       | 1.9 +/- 0.2                                                     |

**Fig. 4 Measurements**

| Background | Measure            | <i>Erbb3<sup>+/+</sup>, R26R<sup>fl/fl</sup>, Tg(Vil1-Cre)</i> | <i>Erbb3<sup>fl/fl</sup>, R26R<sup>fl/fl</sup>, Tg(Vil1-Cre)</i> |
|------------|--------------------|----------------------------------------------------------------|------------------------------------------------------------------|
| C57BL/6J   | Colon polyp number | 1.7 +/- 1.9                                                    | 4.2 +/- 2.4                                                      |
|            | Colon polyp size   | 3.9 +/- 0.1                                                    | 3.8 +/- 0.1                                                      |

**Fig. 5 Measurements**

| Background | Measure                 | <i>Apc<sup>Min/+</sup>, Egfr<sup>fl/fl</sup>, Erbb3<sup>fl/fl</sup></i> | <i>Apc<sup>Min/+</sup>, Egfr<sup>fl/fl</sup>, Erbb3<sup>fl/fl</sup>, Tg(Vil1-Cre)</i> |
|------------|-------------------------|-------------------------------------------------------------------------|---------------------------------------------------------------------------------------|
| C57BL/6J   | Intestinal polyp number | 118.1 +/- 21.4                                                          | 9.0 +/- 3.6                                                                           |
|            | Intestinal polyp size   | 1.9 +/- 0.1                                                             | 0.4 +/- 0.1                                                                           |
