# Supplementary material for: Epithelial-specific ERBB3 deletion results in a genetic background-dependent increase in intestinal and colon polyps that is mediated by EGFR
Source: PubMed Central journal article supplement (PMC8659709; doi:10.1371/journal.pgen.1009931), 2021-11-29
Supplement: pgen.1009931.s002.pdf [file pgen.1009931.s002.pdf]

| Gene symbol                      | Gene name                               | Gene function                                                             | Forward (sequence 5' → 3') | Reverse (sequence 5' → 3') |
|----------------------------------|-----------------------------------------|---------------------------------------------------------------------------|----------------------------|----------------------------|
| <b>ErbB family members</b>       |                                         |                                                                           |                            |                            |
| <i>Egfr</i>                      | Epidermal Growth Factor Receptor        | ErbB tyrosine kinase receptor                                             | GCATCATGGGAGAGAACAACA      | CTGCCATTGAACGTACCCAGA      |
| <i>Erb3</i>                      | Epidermal growth factor receptor 3      | ErbB tyrosine kinase receptor                                             | TCTGCATTAAAGTCATCGAGGAC    | CAGCCGTACAATGTGGGCAT       |
| <b>RNA-sequencing validation</b> |                                         |                                                                           |                            |                            |
| <i>Fas</i>                       | TNF receptor superfamily member 6       | Identical protein binding                                                 | TATCAAGGAGGCCCATTTTGC      | TGTTTCCACTTCTAAACCATGCT    |
| <i>Tcf3</i>                      | Transcription factor 3                  | DNA-binding transcription factor activity                                 | GGGTGCCAGCGAGATCAAG        | ATGAGCAGTTTGGTCTGCGG       |
| <i>IL15</i>                      | Interleukin 15                          | Cytokine activity                                                         | ACATCCATCTCGTGCTACTTGT     | GCCTCTGTTTTAGGGAGACCT      |
| <i>ApoE</i>                      | Apolipoprotein E                        | Protein homodimerization activity                                         | CTGACAGGATGCCTAGCCG        | CGCAGGTAATCCCAGAAGC        |
| <i>Socs3</i>                     | Suppressor of cytokine signaling 3      | Negative regulation of cytokines that signal through the JAK/STAT pathway | ATGGTCACCCACAGCAAGTTT      | CTGGAGCGGCATGTAGTG         |
| <b>Reference genes</b>           |                                         |                                                                           |                            |                            |
| <i>Actb</i>                      | Beta Actin                              | Cytoskeletal structural protein                                           | GGCTGTATTCCCCTCCATCG       | CCAGTTGGTAACAATGCCATGT     |
| <i>Gapdh</i>                     | Glyceraldehyde3-phosphate dehydrogenase | Glycolysis pathway enzyme                                                 | AGGTCGGTGTGAACGGATTG       | GGGGTCGTTGATGGCAACA        |
