# Supplementary material for: Epithelial-specific ERBB3 deletion results in a genetic background-dependent increase in intestinal and colon polyps that is mediated by EGFR
Source: PubMed Central journal article supplement (PMC8659709; doi:10.1371/journal.pgen.1009931), 2021-11-29

Supplementary Figure 3

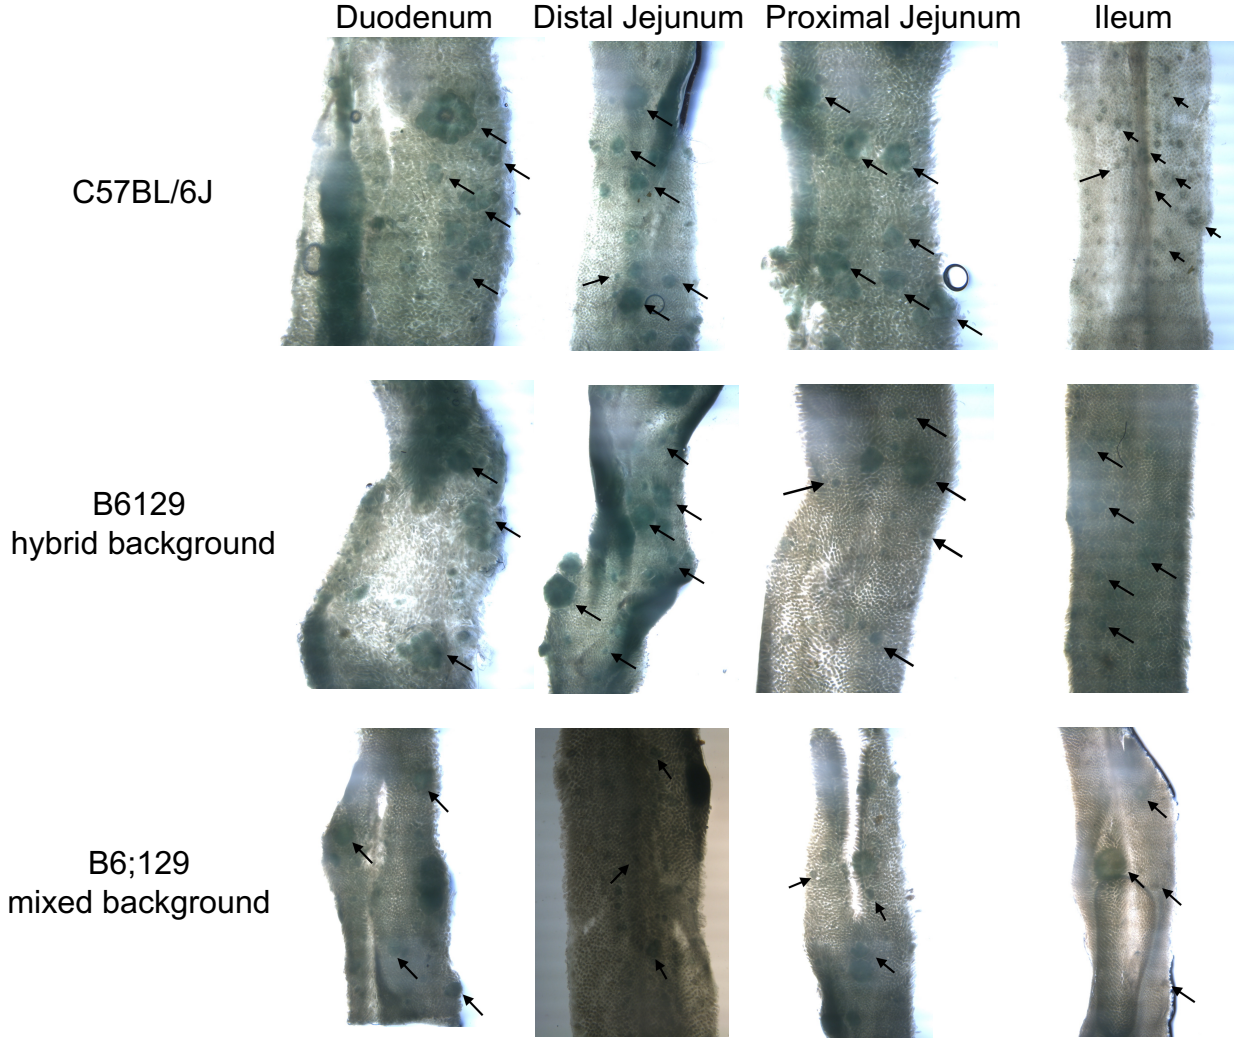

Supplement: pgen.1009931.s005.pdf [file pgen.1009931.s005.pdf]
